# Supplementary material for: A sheath-less electric impedance micro-flow cytometry device for rapid label-free cell classification and viability testing
Source: Royal Society of Chemistry journal article supplement (doi:10.1039/c6ay03326a), 2016-12-20
Supplement: c6ay03326a1.pdf [file c6ay03326a1.pdf]

## Supplementary Information

Video S1 System validation under low flow speed.

Video S2 Cells separated by the channel.

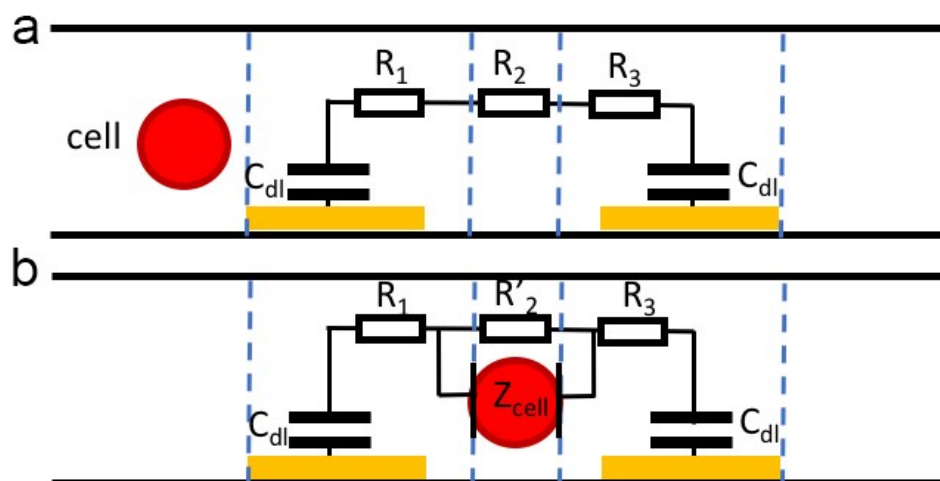

Figure S1 Electric model of the microfluidic channel (a) and a cell pass through the channel (b).

$C_{dl}$ ,  $R_{1-3}$ , and  $Z_{cell}$  represent electrode-solution interface capacitance, solution resistance of different parts ( $R_1$  and  $R_3$ , the constriction part of the channel;  $R_2$ , the narrowest part), and impedance of cell, respectively.

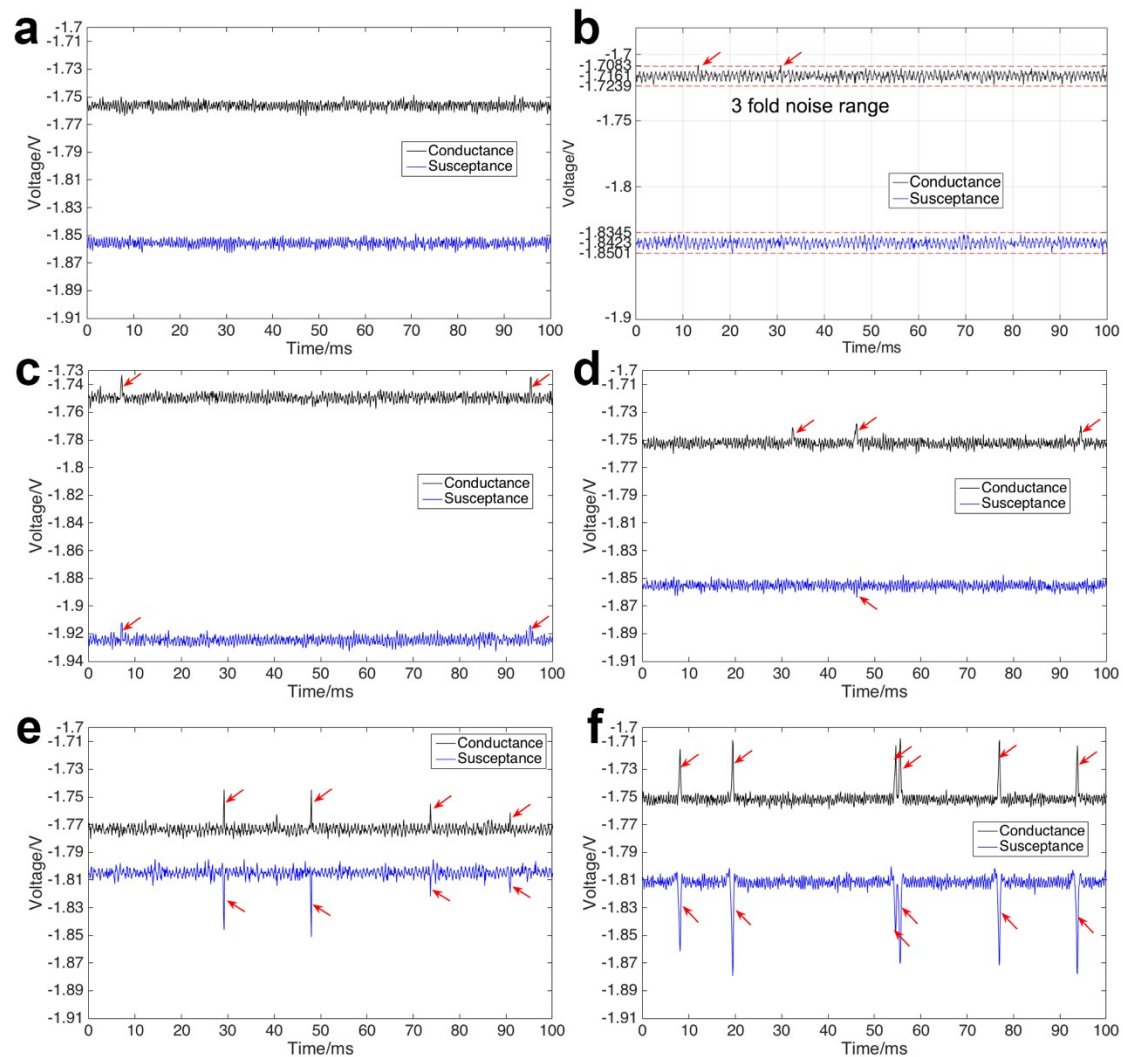

11

12 Figure S2. Raw signals of different cells/particles. Red arrows indicate the pulses of the  
 13 cells/beads (channel height = 12 µm and excitation amplitude = 0.30 V). Impedance  
 14 signals (conductance and susceptance) without any particles (a), or with Ø5-µm polymer  
 15 beads (b), Ø10-µm polymer beads (c), necrotic HeLa cells (d), live Jurkat cells (e), and  
 16 live HeLa cells (f) passing through the detection area.

17

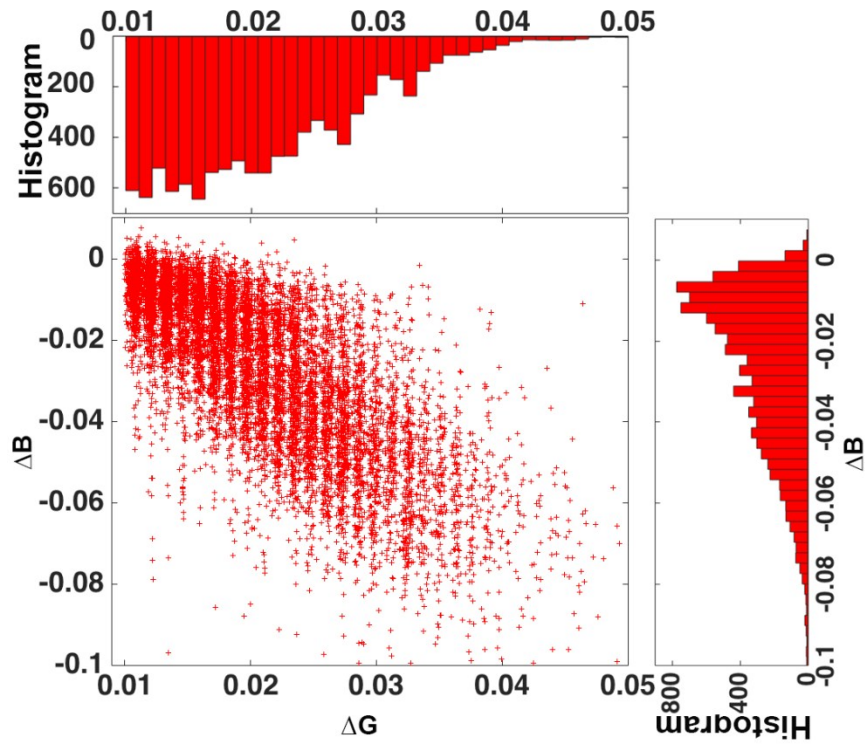

18

19 Figure S3. The scatter and histogram plot of Jurkat cells

20

21

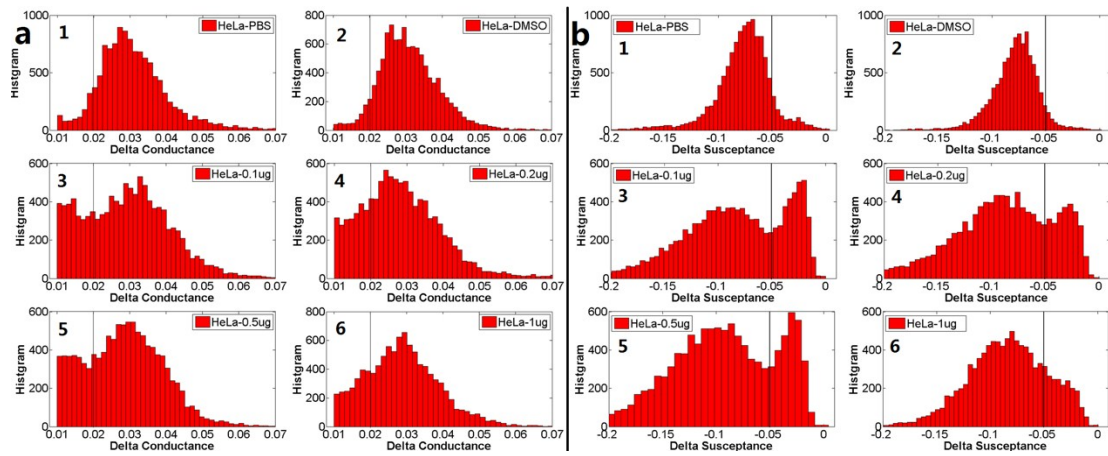

22

23 Figure S4. Histograms of six samples. Black lines indicate the threshold for conductance

24 (a) and susceptance (b).

25

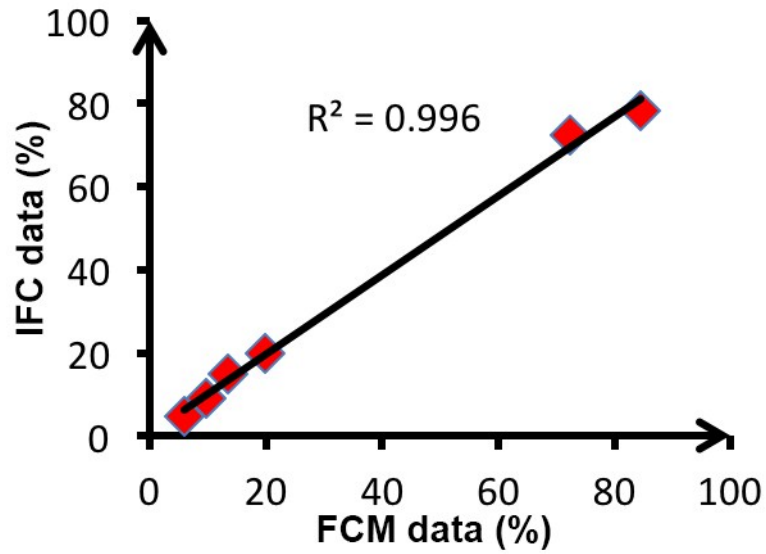

26

27 Figure S5. Comparison of viability tests by IFC and traditional FCM.

28

29 Table S1. Literature summary of IFC chip researches

| Refs.                                                   | Impedance technology                              | Experimental samples                                                         | Materials & channel (width × height) & flow velocity | Demonstrated detection rate & statistical number | Focusing methods & hardware       |
|---------------------------------------------------------|---------------------------------------------------|------------------------------------------------------------------------------|------------------------------------------------------|--------------------------------------------------|-----------------------------------|
| Our methods                                             | Constriction channel with two coplanar electrodes | 3, 5, 7 and 10 $\mu\text{m}$ microspheres<br>Hela, Jurket cell lines         | PDMS<br>$25 \times 12 \mu\text{m}^2$<br>100 mm/s     | 172 cells/s<br>10000 events                      | No focusing                       |
|                                                         | 1MHz                                              |                                                                              |                                                      |                                                  | Lab-build lock-in amplifier       |
| Cheung et al. (2005)<br>Cytometry A 65A:124–132         | Wheatstone bridge                                 | 4, 5, 14 and 6 $\mu\text{m}$ polystyrene beads<br>RBCs, fixed RBCs, ghosts   | Polyimide<br>$40 \times 20 \mu\text{m}^2$<br>10 mm/s | 16.7 cells/s<br>800 events                       | nDEP forces                       |
|                                                         | 350 kHz to 20 MHz                                 |                                                                              |                                                      |                                                  | SR-844, Stanford Research Systems |
| Benazzi et al. (2007) IET<br>Nanobiotechnology 1:94–101 | Wheatstone bridge                                 | Phytoplankton (Isochrysis Galbana, Rhodospirillum rubrum, Synechococcus sp.) | Polyimide<br>$11 \times 20 \mu\text{m}^2$<br>39 mm/s | 100 cells/s<br>2500 events                       | No focusing                       |
|                                                         | 327kHz and 6.03MHz                                |                                                                              |                                                      |                                                  | SR-844, Stanford Research Systems |
| Rodriguez-                                              | Impedance                                         | 20 $\mu\text{m}$ beads                                                       | PDMS                                                 | 20 beads/s                                       | Two/three sheath                  |

|                                                                                          |                                                       |                                                                                           |                                                                             |                                  |                                   |
|------------------------------------------------------------------------------------------|-------------------------------------------------------|-------------------------------------------------------------------------------------------|-----------------------------------------------------------------------------|----------------------------------|-----------------------------------|
| Trujillo et al.<br>(2008)<br>Biosens<br>Bioelectron<br>24:290–296                        | analyser                                              |                                                                                           | $190 \times 50 \mu\text{m}^2$<br>< 5.3 mm/s                                 | < 200 events                     | flow                              |
|                                                                                          | 120 kHz and 1 MHz                                     |                                                                                           |                                                                             |                                  | Agilent 4294A                     |
| Wang et al.<br>(2008) Lab<br>chip 8:309-315                                              | MOSFET drain current                                  | CD4+ T cells                                                                              | PDMS<br>$16 \times 30 \mu\text{m}^2$<br>NA                                  | 8 cells/s<br>1166 events         | No focusing                       |
|                                                                                          | DC                                                    |                                                                                           |                                                                             |                                  | SR 850, Stanford Research Systems |
| Holmes et al.<br>(2009) Lab<br>Chip 9:2881–2889. (2010)<br>Anal Chem<br>82:1455–1461     | Parallel facing electrodes                            | Protein coated<br>5.6 $\mu\text{m}$<br>microspheres,<br>whole blood,<br>CD4 T-Lymphocytes | Polyimide<br>$20 \times 20 \mu\text{m}^2$<br>60 mm/s                        | 100 cells/s<br>5000 events       | nDEP forces                       |
|                                                                                          | 500 kHz to 30 MHz                                     |                                                                                           |                                                                             |                                  | SR 844, Stanford Research Systems |
| Bernabini et al (2011) Lab<br>Chip 11:407-412                                            | Parallel facing electrodes                            | 1, 2 $\mu\text{m}$<br>polystyrene<br>beads and <i>E. coli</i> .                           | Polyimide<br>$200 \times 30 \mu\text{m}^2$<br>38 mm/s                       | 100 cells/s<br>3000-5000 events  | hydrodynamic focusing by oil      |
|                                                                                          | 503 kHz and 5 MHz                                     |                                                                                           |                                                                             |                                  | SR 844, Stanford Research Systems |
| Chen et al.<br>(2011) Lab<br>Chip 11: 3174-3181.<br>(2011)<br>Biomicrofluidics, 5:014113 | Constriction channel with external Ag/AgCl electrodes | MC-3T3 (osteoblasts),<br>MLO-Y4 (osteocytes),<br>EMT6,<br>EMT6/AR1.0                      | PDMS<br>$6 \times 6 \mu\text{m}^2$<br>$8 \times 8 \mu\text{m}^2$<br>NA mm/s | <2 cells/s<br>770 events         | No focusing                       |
|                                                                                          | 10 kHz and 100 kHz                                    |                                                                                           |                                                                             |                                  | Agilent-4294A Impedance Analyzer  |
| Song et al.<br>(2013) Lab<br>Chip 13: 2300-2310.                                         | Constriction channel                                  | 20 $\mu\text{m}$<br>polystyrene<br>beads, P19 stem cells                                  | PDMS<br>$40 \times 27 \mu\text{m}^2$<br>3 mm/s                              | < 2 cells/s<br>200 events        | No focusing                       |
|                                                                                          | 50 kHz, 250 kHz, 500 kHz and 1 MHz                    |                                                                                           |                                                                             |                                  | HF21S, Zurich Instruments         |
| Hassan et al.<br>(2014) Lab<br>Chip 14:1469-1476. (2014)<br>Lab Chip<br>14:4370-4381     | Three coplanar electrodes in constriction channel     | Lymphocytes, granulocytes, monocytes                                                      | PDMS<br>$15 \times 15 \mu\text{m}^2$<br>4400 mm/s                           | 50 cells/s<br>~ 3000 events      | No focusing                       |
|                                                                                          | 303 kHz                                               |                                                                                           |                                                                             |                                  | HF21, Zurich Instruments          |
| Nguyen et al.<br>(2015) Lab<br>Chip 15:1533-1544                                         | external Ag/AgCl electrodes                           | 6.2-8.2 $\mu\text{m}$<br>RBC, 10-15 $\mu\text{m}$ WBC                                     | PDMS<br>$15 \times 15 \mu\text{m}^2$<br>NA mm/s                             | ~8.3 cells/s<br>~<br>10000events | No focusing                       |
|                                                                                          | 10, 100, 400, 990 kHz                                 |                                                                                           |                                                                             |                                  | NA                                |
| Watkins et al.<br>(2011) Lab<br>Chip 11:1437-                                            | Three coplanar electrodes in constriction             | 7.32 mm<br>polystyrene<br>beads, CD4+                                                     | PDMS<br>$15 \times 15 \mu\text{m}^2$<br>2200 mm/s                           | 2236 cells/s<br>26054 events     | No focusing                       |

|       |                                    |                           |  |  |                             |
|-------|------------------------------------|---------------------------|--|--|-----------------------------|
| 1447. | channel                            | and CD8+ T<br>lymphocytes |  |  |                             |
|       | 303 kHz, 1.1<br>MHz and 1.7<br>MHz |                           |  |  | HF21, Zurich<br>Instruments |

30

31

32

33
